# Supplementary material
Source: publisher figshare collection journal article supplement (https://wiley.figshare.com/articles/dataset/_/3557421)
Supplement: Supplementary file 1 [file 1 › appendix-A.htm]

Ecological Archives E094-190-A1


*Ecological Archives* E094-190-A1

Bryan S. Stevens, Brian Dennis. 2013. Wildlife mortality from infrastructure collisions: statistical modeling of count data from carcass surveys. *Ecology* 94:2087–2096. http://dx.doi.org/10.1890/12-1052.1

Appendix A. Analytical maximum-likelihood estimators of θ from Eqs. 7 and 8.

> View / download PDF.


---

[Back to E094-190]
